# Supplementary material for: Uncovering emergent phenotypes in endothelial cells by clustering of surrogates of cardiovascular risk factors
Source: PubMed Central journal article supplement (PMC8789842; doi:10.1038/s41598-022-05404-7), 2022-01-25
Supplement: 41598_2022_5404_MOESM5_ESM.pdf [file 41598_2022_5404_MOESM5_ESM.pdf]

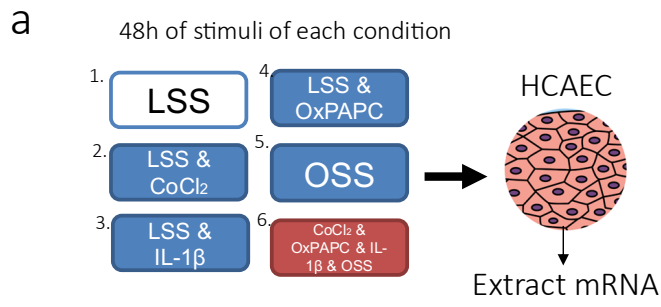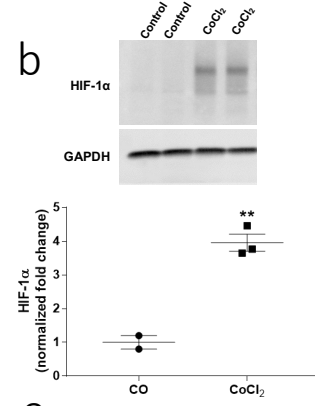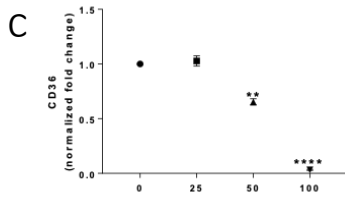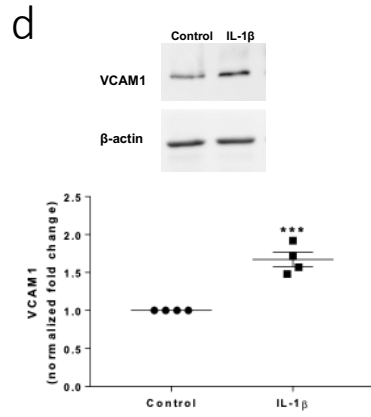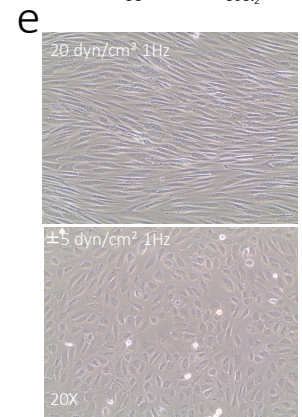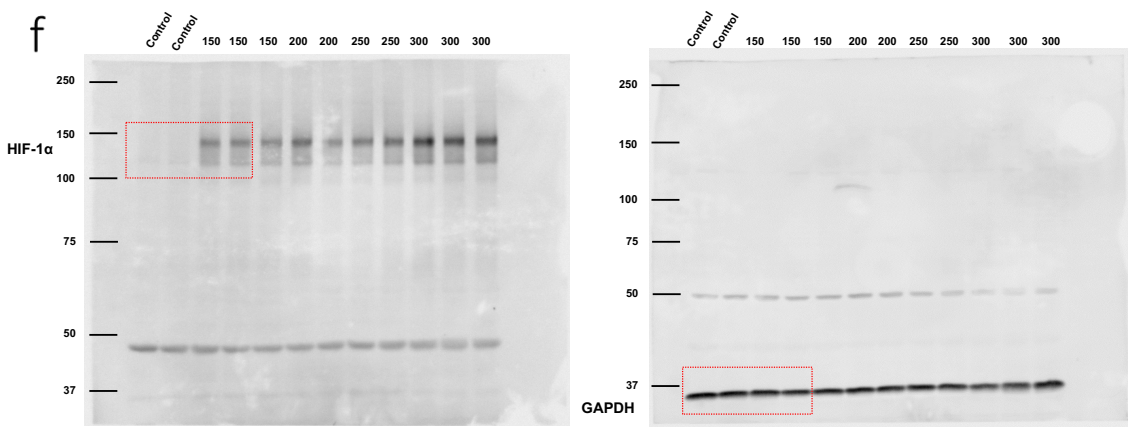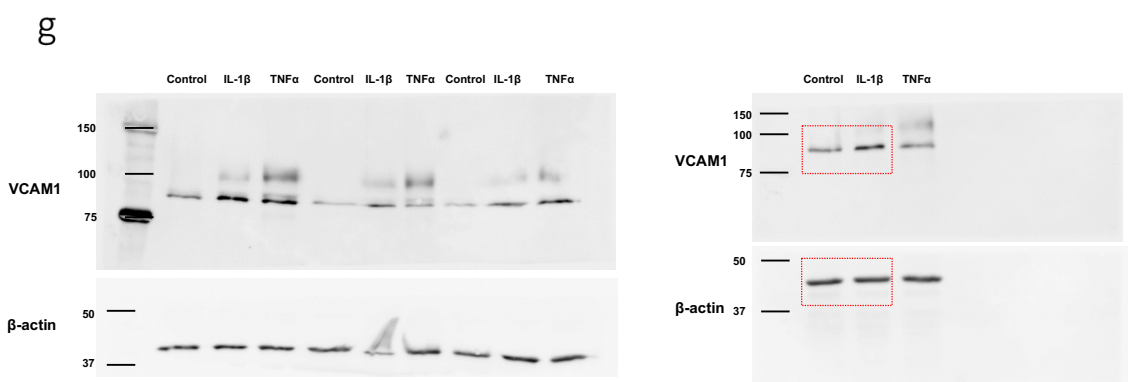

**Supplementary Fig 1. *In vitro* shear stress in human coronary artery endothelial cell (HCAEC) model and further standardization of each stimuli.** **a** Overall design of HCAEC submitted to each stimulus, either individual or combined. **b** HCAEC under static condition stimulated with  $\text{CoCl}_2$  for 48 h, and then HIF-1 $\alpha$  protein expression was determined by Western blot (\*\* $p < 0.01$ , vs. static control,  $n = 3$ ), GAPDH served as a housekeeping protein. **c** HCAEC under static condition simulated by OxPAPC by 48h, RNA collected was reverse transcribed and cDNA was used for real-time PCR quantification of *CD36* and *ATF3* using GAPDH as an internal control (\*\* $p < 0.01$ , \*\*\* $p < 0.001$ , \*\*\*\* $p < 0.0001$  vs. static control,  $n = 2$ ). **d** HCAEC under static condition stimulated with IL-1 $\beta$ , and then VCAM1 protein expression was determined by Western blot (\*\*\* $p < 0.001$  vs. static control,  $n = 4$ ), served as a housekeeping protein  $\beta$ -actin. **e** HCAEC under LSS and OSS for 48h showing an aligned cell pattern in LSS when compared to EC under OSS. Data are presented as mean  $\pm$  SEM;  $p$  values were determined by Student's t-test (**c,d**) and One way-Anova (**c**). **f** HCAEC under static condition stimulated with  $\text{CoCl}_2$  (100, 200, 250 or 300 $\mu\text{M}$ ) for 48 h, and then HIF-1 $\alpha$  protein expression was determined by Western blot. GAPDH served as a housekeeping protein. **g** HCAEC under static condition stimulated with IL-1 $\beta$  and TNF $\alpha$ , and then VCAM1 protein expression was determined by Western blot.  $\beta$ -actin served as a housekeeping protein. Figure **a** created in the Mind the Graph platform ([www.mindthegraph.com](http://www.mindthegraph.com)).

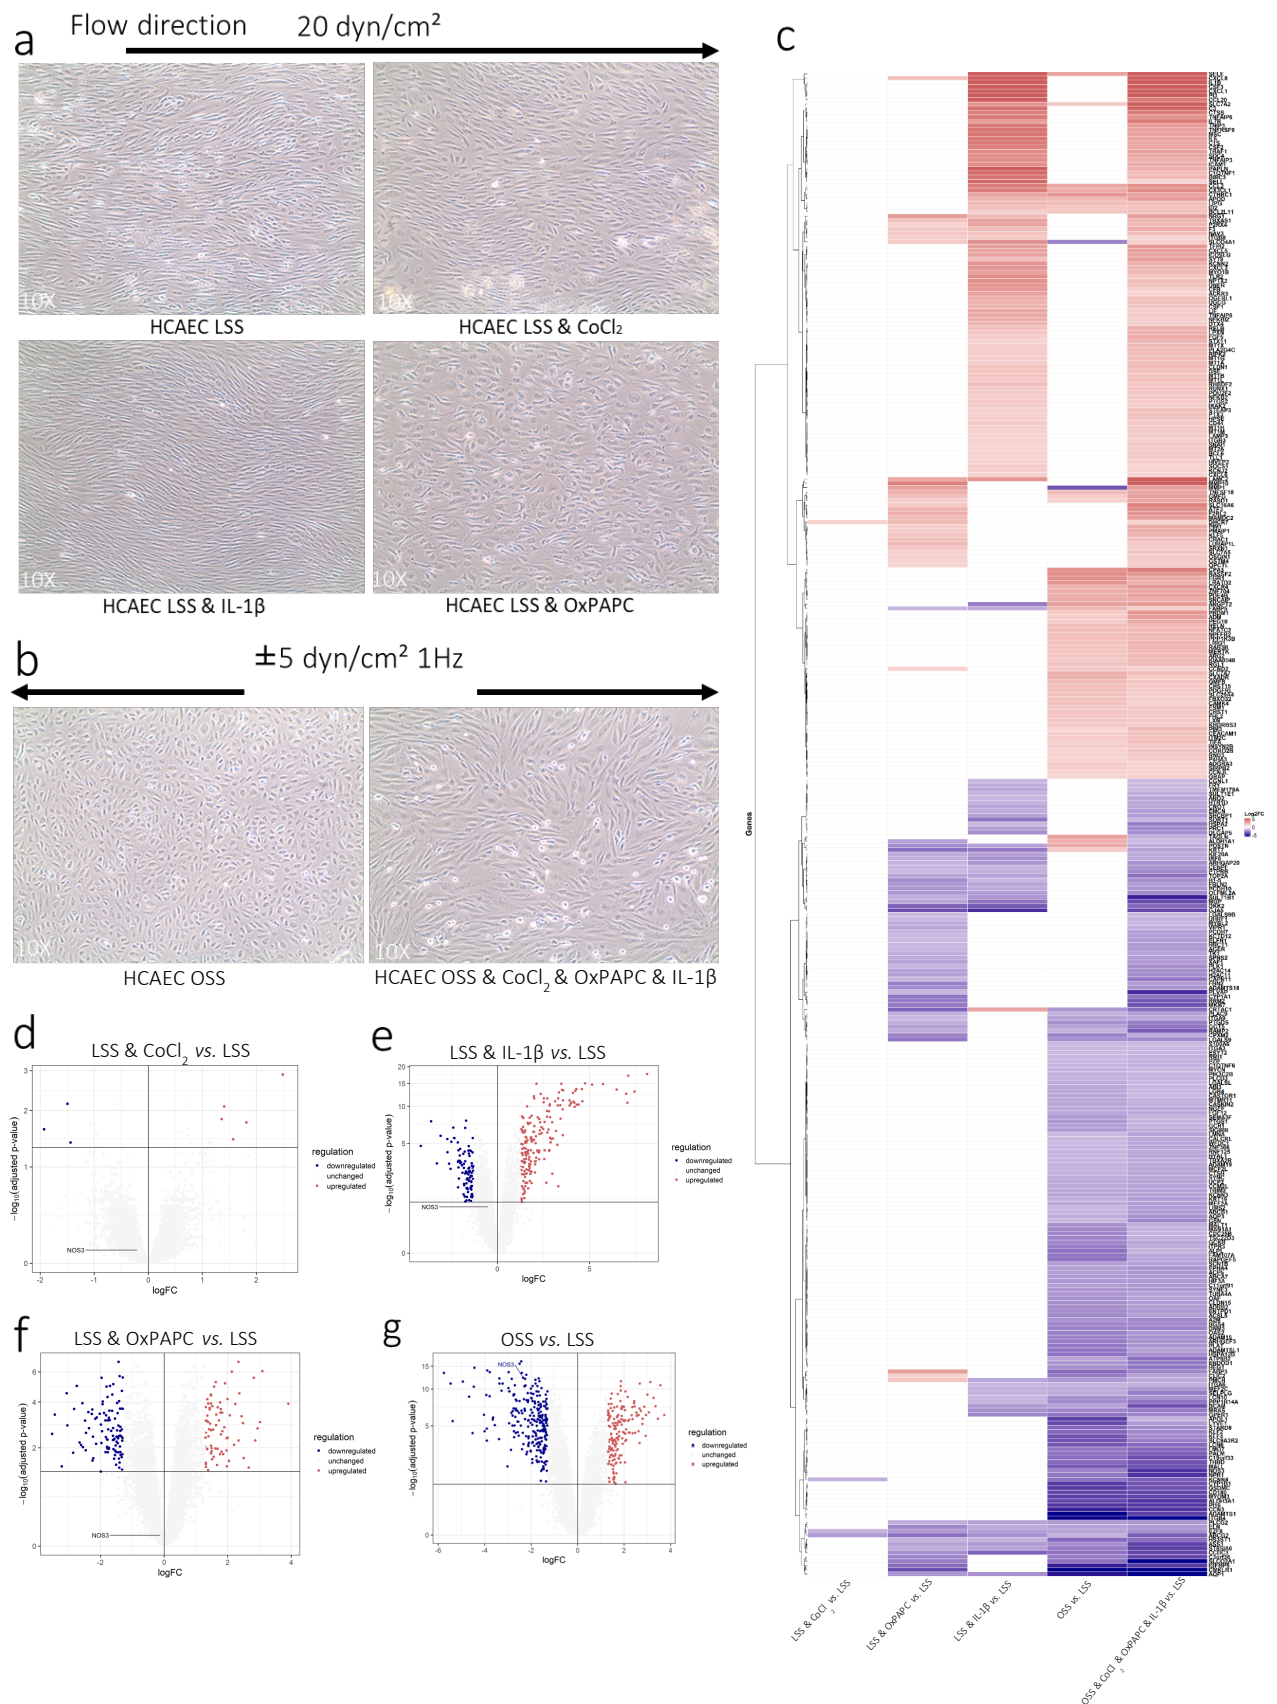

**Supplementary Fig 2. Human coronary artery endothelial cell (HCAEC) under the CoCl<sub>2</sub>, IL-1β, OxPAPC and OSS and their differentially expressed genes (DEGs) when compared to LSS. a** HCAEC submitted to unidirectional LSS (20dyn/cm<sup>2</sup>) alone or combined with CoCl<sub>2</sub> (150μM), IL-1β (10ng/ml) and OxPAPC (40μg/ml) by 48h. **b**

HCAEC submitted to bidirectional OSS ( $\pm 5 \text{ dyn/cm}^2$  1Hz) alone or together with  $\text{CoCl}_2$ , IL-1 $\beta$ , and OxPAPC. **c** Heatmap of 349 DEGs of the clustered risk factors that are differentially expressed in the individual condition. Example of stimuli-dependent genes red arrows. **d-g** Volcano plots showing the DEGs when comparing each stimulus to LSS. The DEGs were considered as adjusted  $p$ -value  $< 0.05$  and  $|\text{Log}_2\text{foldchange}| > 1.3$  highlighting the expression of *NOS3*.



a

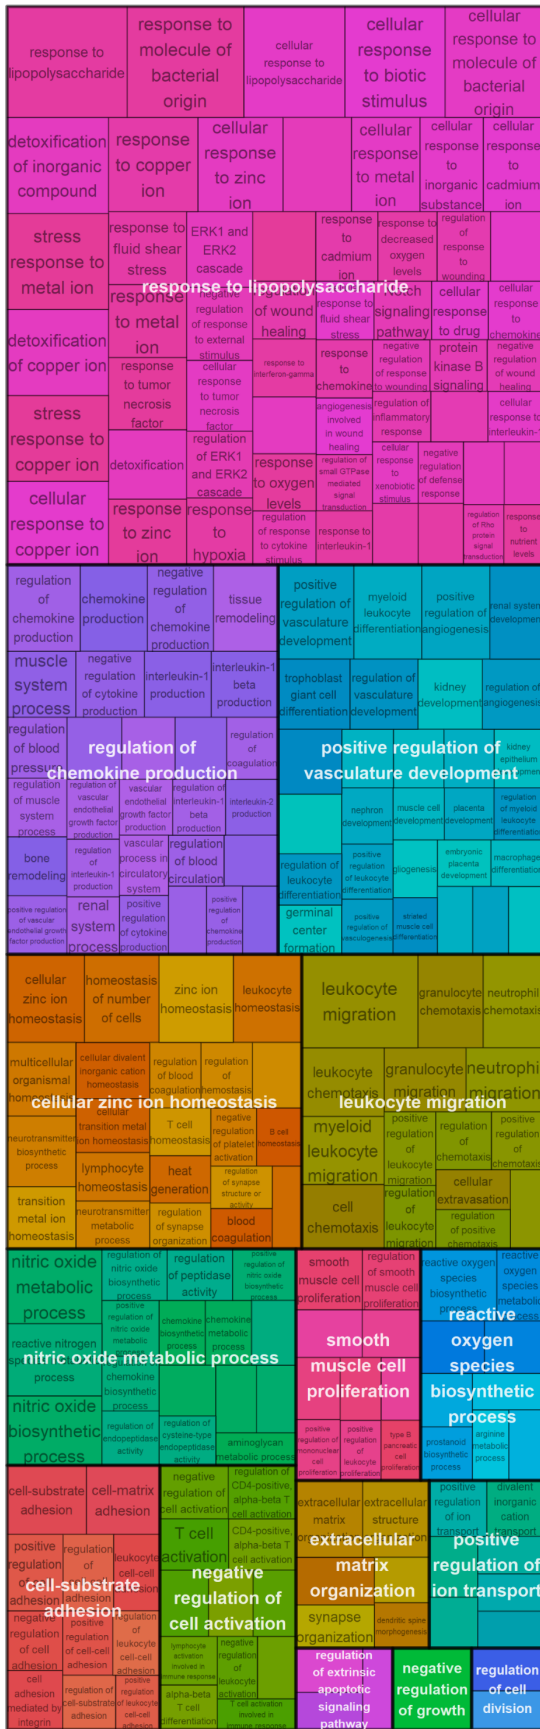

b

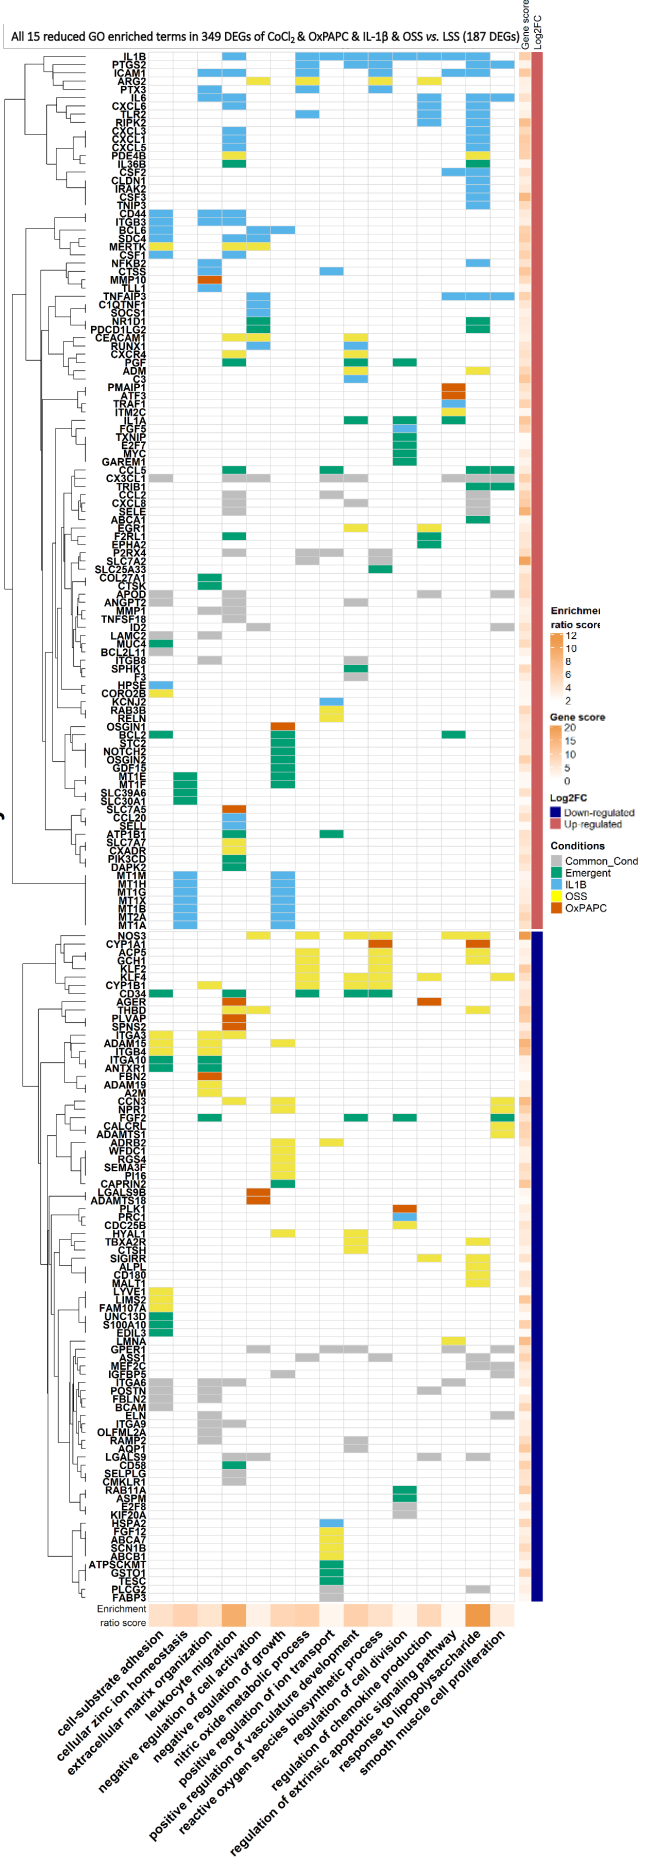

**Supplementary Fig 3. Gene Ontologies (GO) reduced enriched terms for the 620 differentially expressed genes (DEGs) of the clustered risk factors vs. LSS. a** GO enrichment analysis followed by redundancy analysis identified and kept the most representative term from the redundant terms (cutoff = 0.9 and adjusted  $p$ -value  $\leq 0.05$ ). Gene score and enrichment risk score were calculated by  $-\log_{10}(\text{adjusted } p\text{-value})$ . The DEGs considered were adjusted as  $p$ -value  $\leq 0.05$  and  $|\text{Log}_2\text{foldchange}| \geq 1.3$ . **b** Canonical enriched terms in CoCl<sub>2</sub> & IL1B & OxPAPC & OSS vs. LSS (121 DEGs) and the source of the stimulus individual (represented by colours light blue, yellow and orange), common (grey), more than one stimulus and if it is emergent, meaning that the gene is only altered if all four stimuli are combined (green). Gene score and enrichment risk score were calculated by  $-\log_{10}(\text{adjusted } p\text{-value})$ .



**Supplementary Fig 4. Transcription factors (TFs) regulatory network of each stimulus. a** CoCl<sub>2</sub> & LSS vs. LSS regulatory network. **b** OxPAPC & LSS vs. LSS regulatory network. **c** IL-1 $\beta$  & LSS vs. LSS regulatory network. **d** OSS vs. LSS regulatory network. Using the TRRUST database (version 2), the TFs were mapped to their published transcriptional targets. The identified transcriptional network was further filtered based on whether the TF and their targets were a DEG (adjusted  $p$ -value  $\leq 0.05$  and  $|\text{Log}_2\text{foldchange}| \geq 1.3$ ). The diamond shape is TF and the square is the DEG target. The edges mean arrow (activation), circle (unknow) and bar (repression). Node size according to the degree. Genes in blue are downregulated, genes in red upregulated. Green is a modulated emergent gene; Orange is an OxPAPC modulated gene; Light blue is an IL-1 $\beta$  modulated gene; Yellow is an OSS modulated gene; Gray when the gene is modulated in more than one condition. **e** Heatmap of 38 target DEGs from the TF NFKB1 and their log<sub>2</sub>foldchange in LSS & IL-1 $\beta$  vs. LSS and CoCl<sub>2</sub> & OxPAPC & IL1B & OSS vs. LSS.

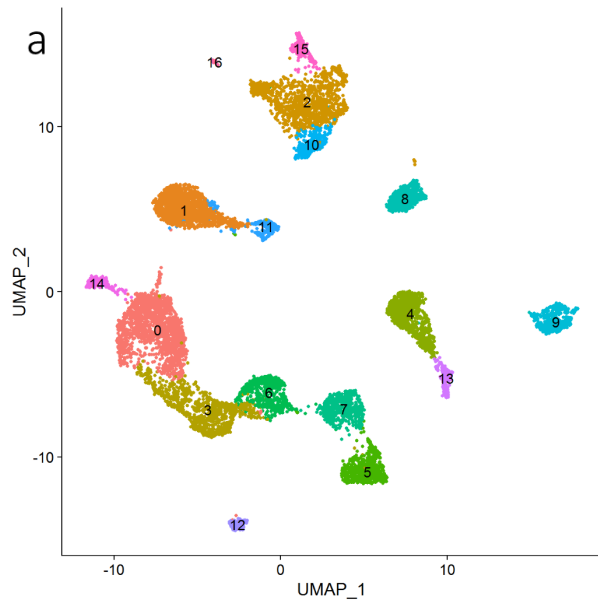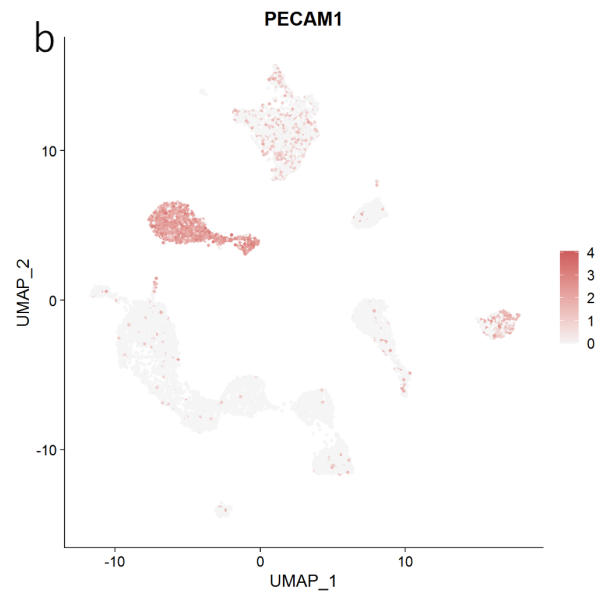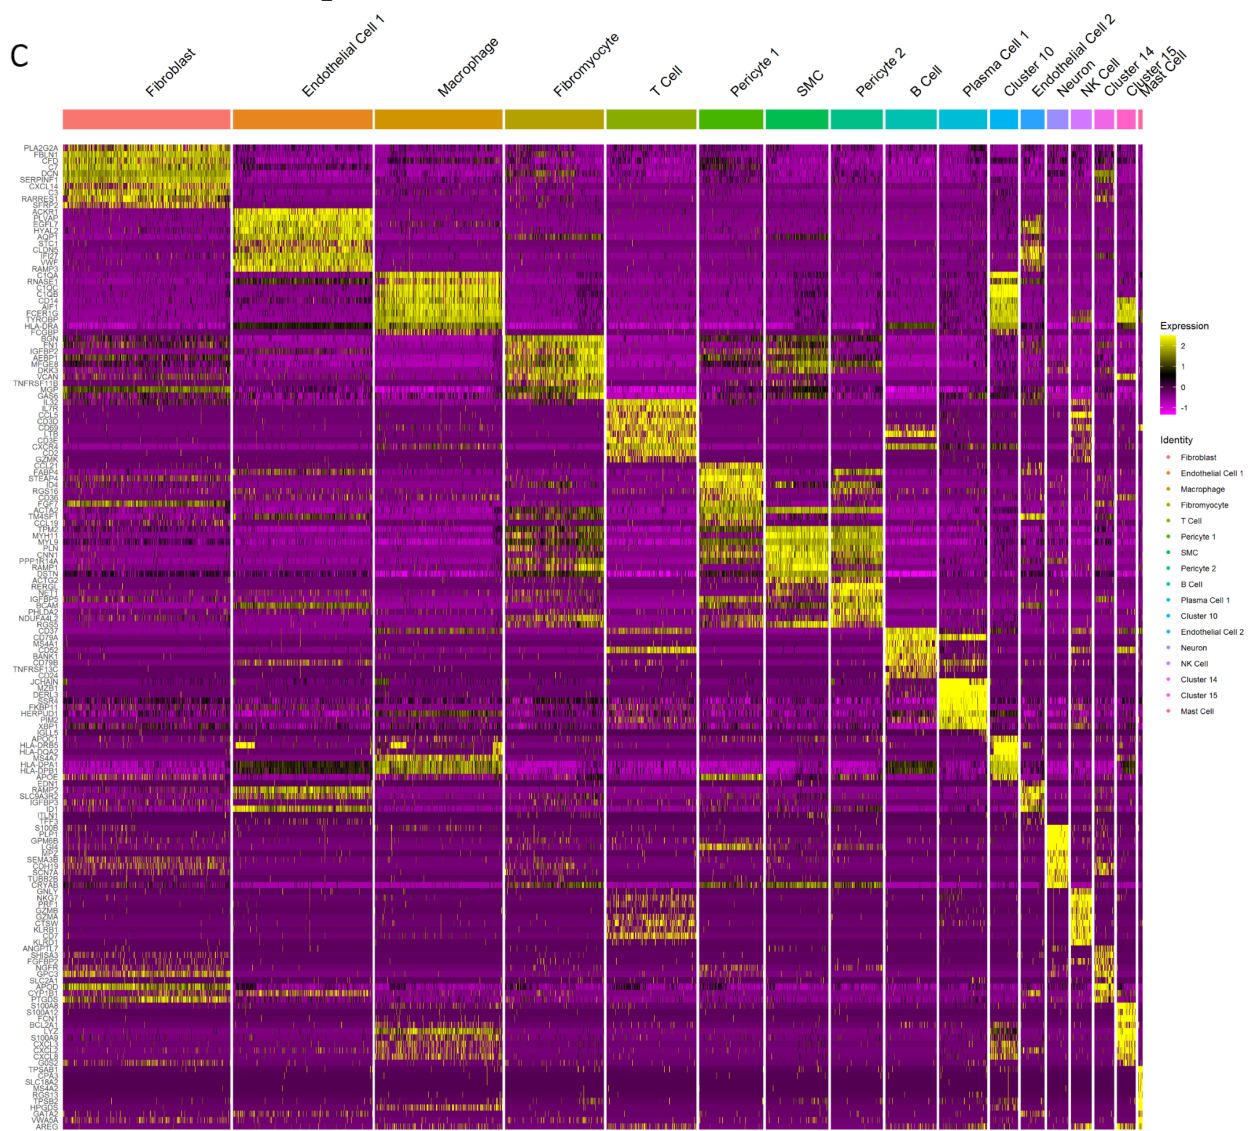

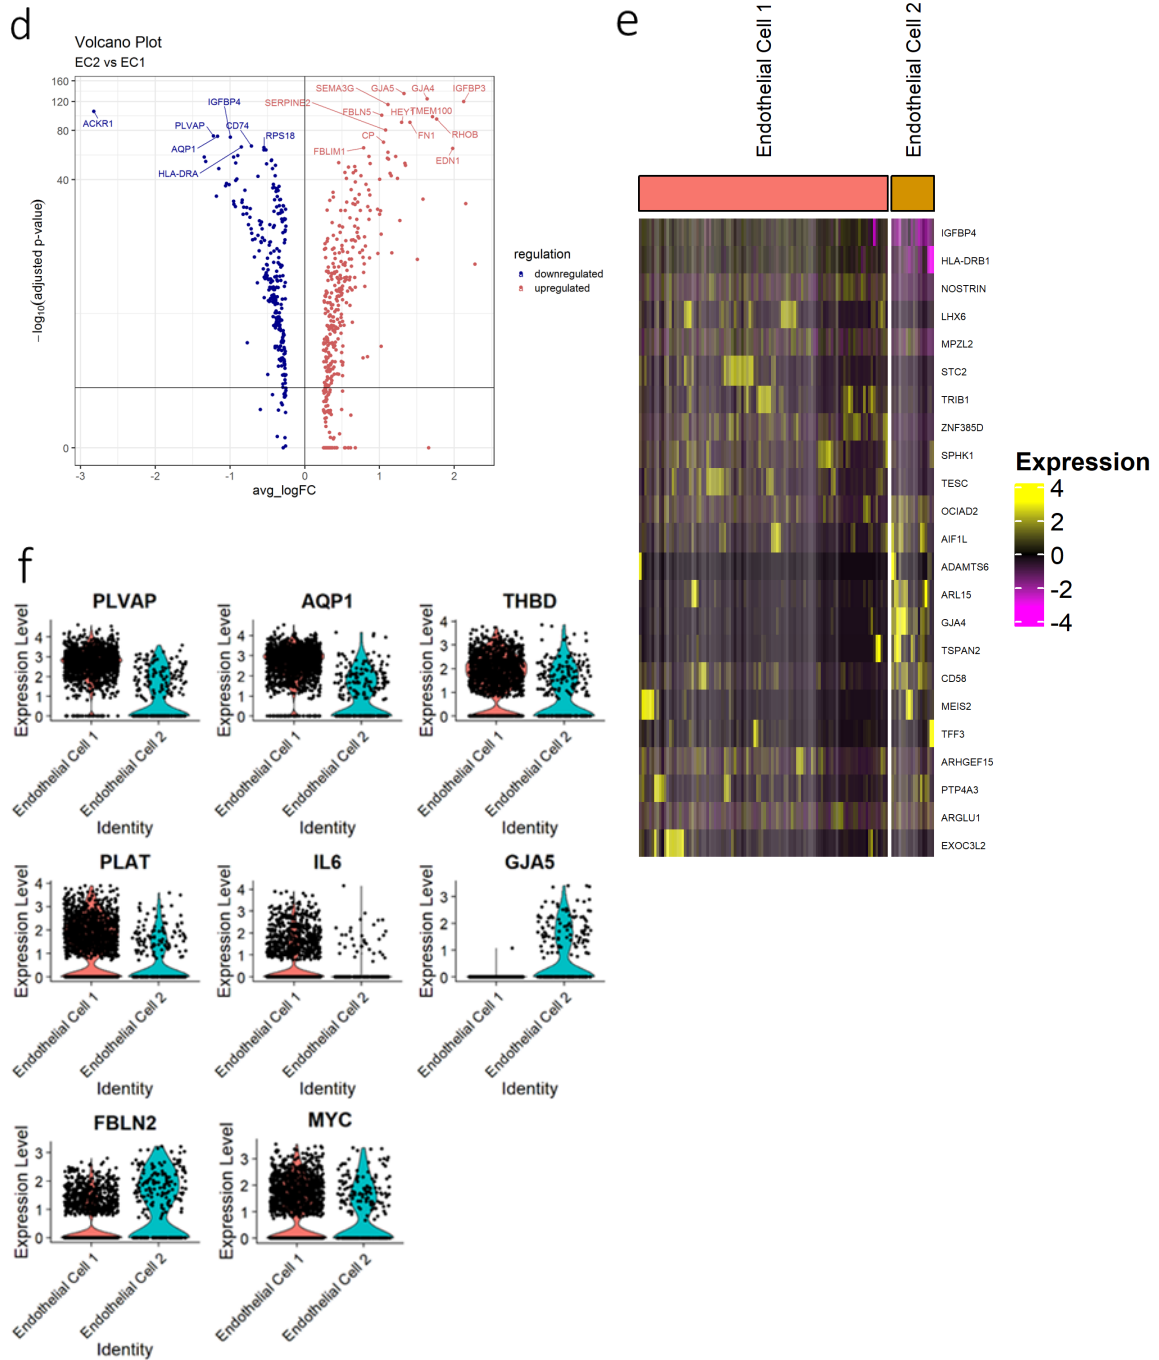

**Supplementary Fig 5. a** UMAP visualization of clustering identified 17 cell populations ( $n = 10,671$  cells) using the cluster marker genes found with Seurat's function `FindAllMarkers()`, which finds differentially expressed genes between a cluster and all remaining cells. DEGs were considered as adjusted  $p$ -value  $\leq 0.05$  and  $|\text{Log}_2\text{foldchange}| \geq 0.25$ . **b** UMAP visualization of a key endothelial cell (EC) marker *PECAMI* (*CD31*). **c** Heatmap of the top 10 gene markers expression levels from each cell in the 17 cell clusters. **d** Volcano plots showing the differentially expressed genes (DEGs) when comparing EC2 vs. EC1. The DEGs were considered as adjusted  $p$ -value  $< 0.05$  and  $|\text{Log}_2\text{foldchange}| > 0.25$  highlighting the top 20 DEGs. **e** Heatmap of the emergent DEGs expression levels in which they are differentially expressed in the comparison EC2 vs.



EC1. **f** Violin plot of canonical clustered risk factors DEGs which are differentially expressed in EC2 vs. EC1.
